# Supplementary material for: Therapeutic drug monitoring of immunotherapies with novel Affimer–NanoBiT sensor construct
Source: Royal Society of Chemistry journal article supplement (doi:10.1039/d3sd00126a), 2023-11-01
Supplement: d3sd00126a1.pdf [file d3sd00126a1.pdf]

## Supplementary Information

### Therapeutic drug monitoring of immunotherapies with novel Affimer-NanoBiT sensor construct

Emma Campbell<sup>1,2</sup>, Hope Adamson<sup>1,2</sup>, Timothy Luxton<sup>1,2</sup>, Christian Tiede<sup>2,3</sup>, Christoph Wälti<sup>4</sup>, Darren C Tomlinson<sup>2,3</sup>, Lars JC Jeuken<sup>1,2,5,\*</sup>

<sup>1</sup> School of Biomedical Science, University of Leeds, Leeds, LS2 9JT, United Kingdom

<sup>2</sup> Astbury Centre for Structural Molecular Biology, University of Leeds, LS2 9JT, United Kingdom

<sup>3</sup> School of Molecular and Cellular Biology, University of Leeds, Leeds, LS2 9JT, United Kingdom

<sup>4</sup> School of Electronic and Electrical Engineering, University of Leeds, LS2 9JT, United Kingdom

<sup>5</sup> Leiden Institute of Chemistry, Leiden University, PO Box 9502, 2300 RA, Leiden, the Netherlands

\* Corresponding author: L.J.C.Jeuken@lic.leidenuniv.nl

### Contents

Supplementary Methods

Supplementary Figures

DNA and Protein Sequences

Table of Primers

### Supplementary Methods

#### Surface plasmon resonance

Affimer affinities for their TmAb analyte were determined by surface plasmon resonance (SPR) using a BIAcore 3000 (GE Healthcare Europe GmbH). Trastuzumab, ipilimumab, adalimumab and rituximab were covalently immobilized on separate channels of a CM5 sensor chip with amine-coupling chemistry. The chip was activated with 200 mM 1-Ethyl-3-(3-dimethylaminopropyl) carbodiimide (EDC) and 50 mM N-Hydroxysuccinimide (NHS) before target injection under optimised conditions (trastuzumab, 5 µg mL<sup>-1</sup> in 10 mM acetate pH 5.5; ipilimumab, 5 µg mL<sup>-1</sup> in 10 mM acetate pH 5.5; rituximab, 5 µg mL<sup>-1</sup> in 10 mM acetate pH 5.5; adalimumab, 5 µg mL<sup>-1</sup> in 10 mM acetate pH 4.5). Remaining reactive groups were capped with ethanolamine (1 M, pH = 8.5). Biacore experiments were performed at 25°C in PBST buffer (PBS pH 7.4, containing 150 mM NaCl and 0.2 % Tween 20). Affimers were injected at 1.5625, 3.125, 6.25 and 12.5 nM at a flow rate of 5 µL min<sup>-1</sup>, followed by 12 minute dissociation. The on- and off- rates and K<sub>d</sub> parameters were obtained from a global fit to the SPR curves using a 1:1 langmuir model, using the BIAevaluation software. Quoted K<sub>d</sub> values are the mean ± SEM of three replicate runs, unless specified otherwise.

## Supplementary Figures

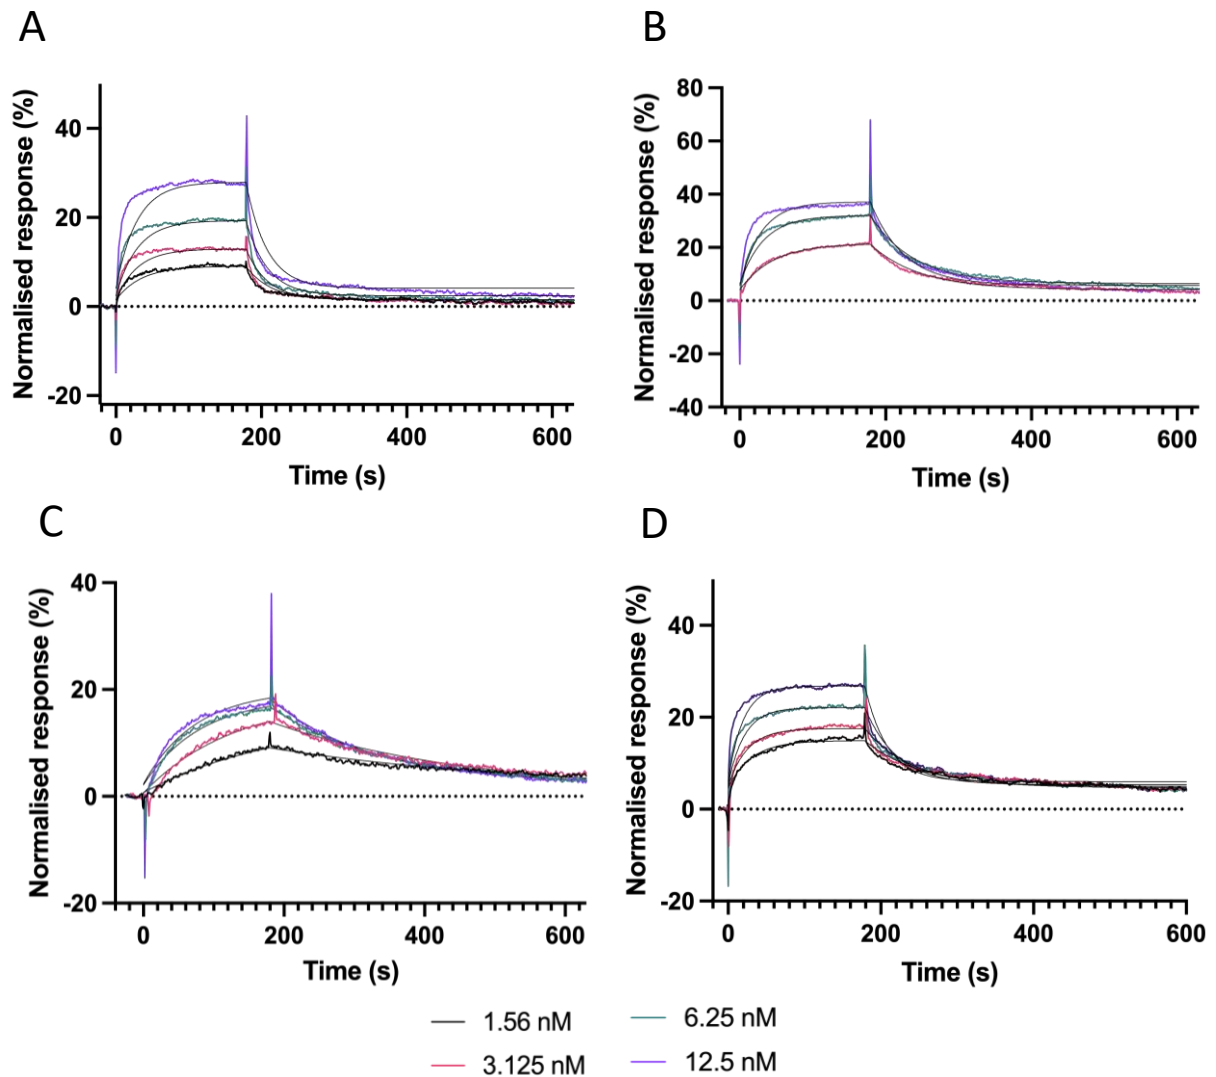

**Figure S1. Surface Plasmon Resonance (SPR) curves plotted for each anti-idiotype Affimer to analyse binding to their respective TmAb.** Aff-Ada and Adalimumab (A), Aff-Ipi and ipilimumab (B), Aff-rit and rituximab (C) and Aff-trast and trastuzumab (D). SPR plots are shown between TmAb concentrations of 1.56 nM and 12.5 nM. Langmuir model fits are plotted alongside each concentration for each TmAb-Affimer binding study. SPR experiments were conducted in triplicate (duplicate for Aff-Ipi) however only replicate one has been included here. Initial evaluation of SPR data and Langmuir model fits were conducted on BIAevaluation software. Raw data for all plots and fits were then extracted from BIAevaluation and plotted on GraphPad to improve visualisation of data.

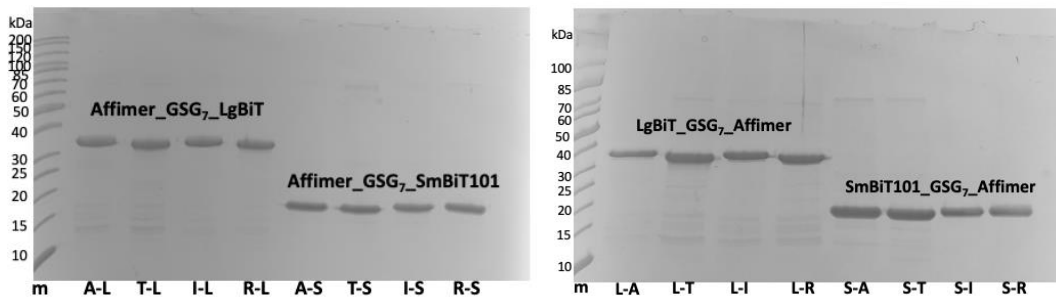

**Figure S2. SDS-PAGE of purified Affimer-NanoBiT sensors.** *Left:* visualisation of anti-ID Affimer NanoBiT construct where the luciferase fragment has been attached to the C-terminus of the Affimer protein with a polypeptide linker. *Right:* visualisation of anti-ID Affimer NanoBiT construct where the luciferase fragment has been attached to the N-terminus of the Affimer protein with a polypeptide linker.

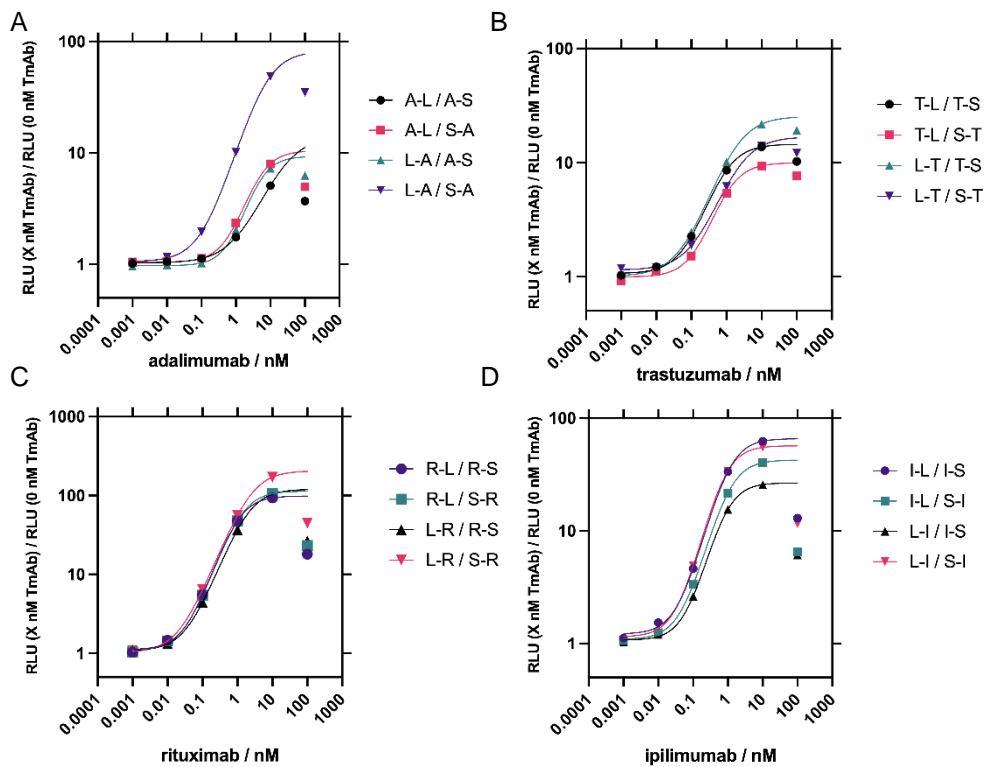

**Figure S3. selection of best LgBiT / SmBiT101 NanoBiT sensor combinations for each TmAb target.** A: anti-adalimumab sensor pairs, B: anti-trastuzumab sensor pairs, C: anti-rituximab sensor pairs, D: anti-ipilimumab sensor pairs. 10  $\mu$ L of each sensor, to a final concentration of 2 nM, were incubated with 5  $\mu$ L of target TmAb at final concentrations ranging from 0.001 – 100 nM. Plates were incubated at 25°C, shaking for 30 minutes. 25  $\mu$ L of NanoGlo diluted 1:500 was then added, and luminescence readings taken immediately ( $t = 0$ ). Sigmoidal, 4 parameter logistic (4PL) fits were used on data points up to  $X = 10$  nM. Due to the evident hook effect at  $X = 100$  nM, these data points were not included in the fit and the curve was extrapolated for these points.  $n = 1$ .

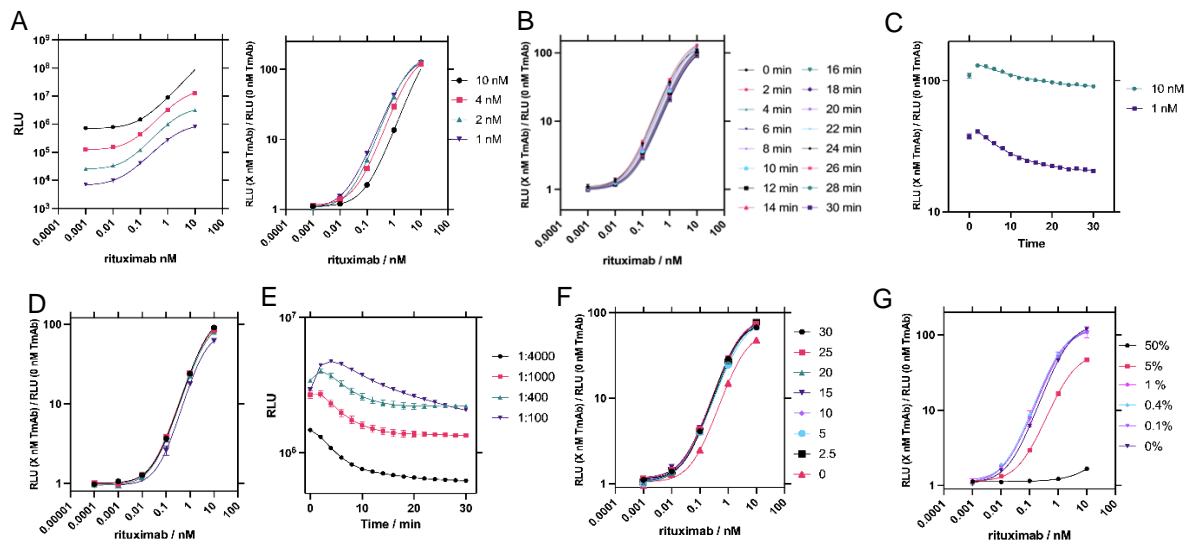

**Figure S4. Optimisation of assay to detect therapeutic monoclonal antibodies using rituximab as a template target.** **A** The higher the concentration of sensor components, the less sensitive the assay. RLU (left) and Fold gain (right) data from NanoBiT assays performed on the selected optimal LgBiT / SmBiT101 pair for rituximab with varying sensor concentrations. Measurements taken 2 minutes after substrate incubation. Sigmoidal, 4 parameter logistic (4PL) fits were used on data points up to  $X = 10$  nM. Due to RLU measurements of the 10 nM sensor pair at  $X = 10$  nM being over the limit of RLU measurement of the Tecan, the fits were extrapolated for these points, but no data points were plotted.  $n = 2$ , data is plotted as a mean of 2 repeats with  $\pm$ SEM, where error bars are not visible, they are within the symbol. **B** RLU measurements are highest 2 minutes after substrate addition. Fold gain measurements in response to 0.001 – 10 nM rituximab measured every 2 minutes from  $t = 0$  to  $t = 30$  minutes. Sigmoidal, 4 parameter logistic (4PL) fits were used with data points plotted as  $n = 2$  with error bars representing  $\pm$ SEM. **C** Luminescence signal decay begins 2 minutes after substrate addition. Change in fold-gain luminescence signal of anti-rituximab sensor (L-R/S-R) in response to 10 nM and 1 nM rituximab, plotted against time. RLU readings were taken every 2 minutes from 0-30 minutes post substrate incubation. Non-linear regression curves were fit using a one phase exponential decay equation  $Y = \text{Span} \cdot e^{-K \cdot X} + \text{Plateau}$  starting at  $X = 2$  minutes. Data points were plotted as  $n = 2$  with error bars representing  $\pm$ SEM. **D** Use of higher concentrations of substrate (1:50) can affect the sensitivity of the assay. The fold-gain luminescence signal of anti-rituximab sensor (L-R/S-R) in response to increasing concentrations of rituximab, using varying dilutions of the NanoGlo substrate. Luminescence measurements were taken 2 minutes after substrate addition. Sigmoidal, 4 parameter logistic (4PL) fits were used. Data points were plotted as  $n = 3$ , error bars represent  $\pm$ SEM. **E** Signal decay is more rapid at lower concentration of substrate (1:2000). Change in fold-gain luminescence signal of anti-rituximab sensor (L-R/S-R) in response to 10 nM rituximab, plotted against time for four dilutions of NanoGlo substrate. RLU readings were taken every 2 minutes from 0-30 minutes post substrate incubation. Non-linear regression curves were fit using a one phase exponential decay equation  $Y = \text{Span} \cdot e^{-K \cdot X} + \text{Plateau}$  starting at  $X = 2$  minutes. Data points were plotted as  $n = 3$  with error bars representing  $\pm$ SEM. **F** The shaking incubation time does not impact the sensitivity of the assay. Fold gain data from NanoBiT assays performed on the selected optimal LgBiT / SmBiT101 pair for rituximab (L-R/S-R) with varying shaking incubation time at 25°C. Measurements taken 2 minutes after substrate incubation. Sigmoidal, 4 parameter logistic (4PL) fits were used. Data points were plotted as  $n = 1$ . **G** L-R/S-R is functional in up to 10% pooled human serum. The fold-gain luminescence signal of anti-rituximab sensor (L-R/S-R) in response to increasing concentrations of rituximab, in varying dilutions of pooled human serum. Luminescence measurements were taken 2 minutes after substrate addition. Sigmoidal, 4 parameter logistic (4PL) fits were used. Data points were plotted as  $n = 3$  (0%, 0.1%, 0.4%, 1%) or  $n = 2$  (5%, 50%), error bars represent  $\pm$ SEM. Unless otherwise specified, these assays were performed with 30 min. incubation between Affimer-constructs and TmAb, followed by addition of 1:1000 NanoGlo and bioluminescence read after 2 min.

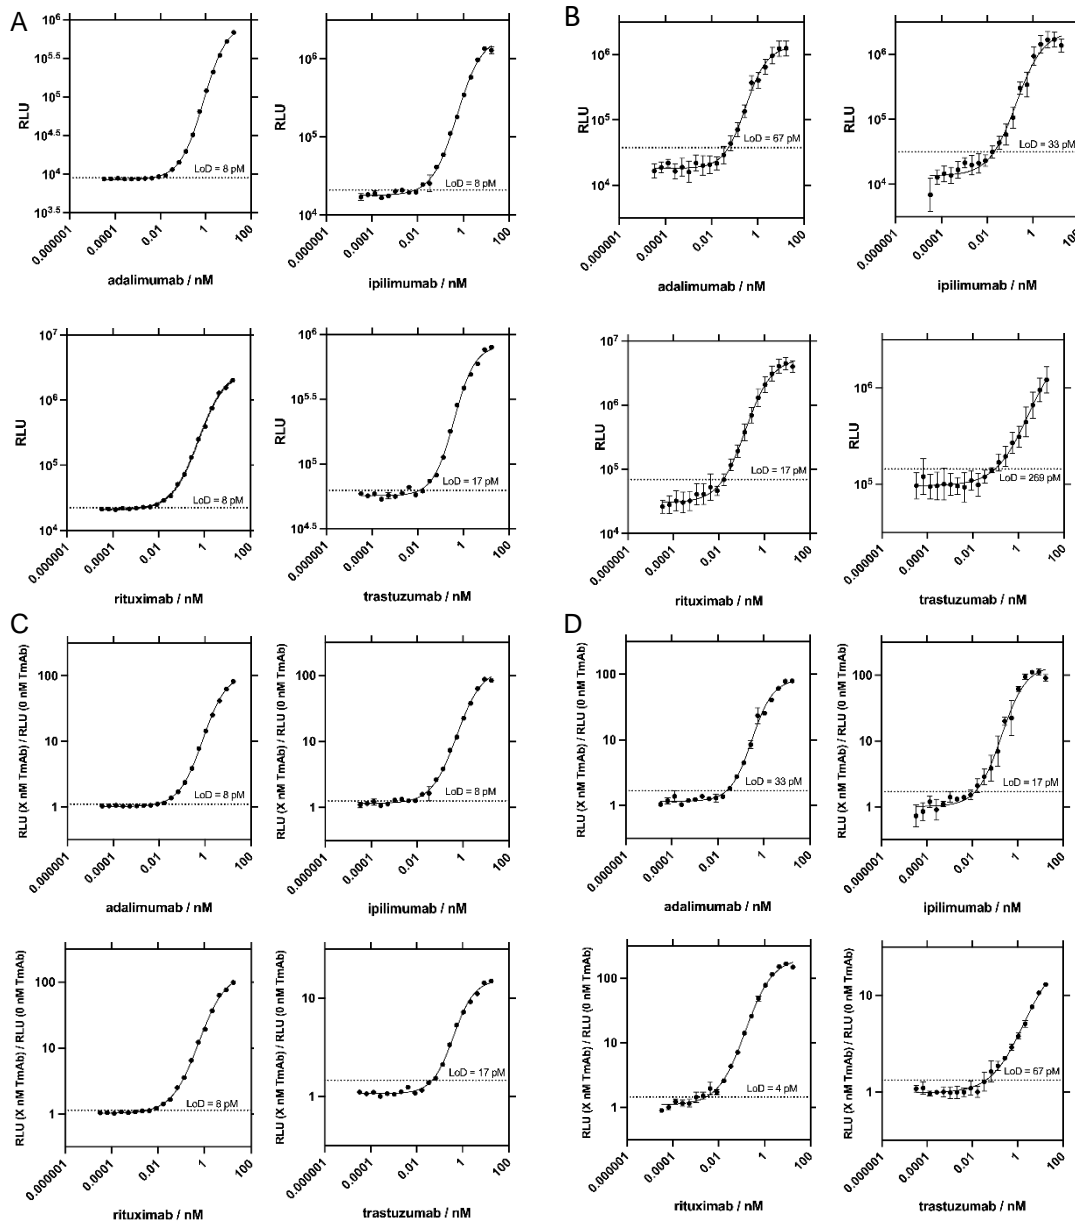

**Figure S5. Standard curves of all four TmAb sensor pairs.** Data on all sensors at 2 nM in response to increasing concentrations of their respective TmAb (0.005 – 2500 ng mL<sup>-1</sup>). Assays were performed in 0.1% pooled human serum, incubated for 5 minutes shaking at 25°C, and RLU measurements taken after 2 minutes. Standard curves were interpolated for all four sensors **A & C** n = 3, performed on the same day with the same reagents. **B & D** N = 3, performed on separate days, using fresh reagents. Data points were plotted as raw RLU data (**A & B**) or fold gain from 0 analyte blank measurements (**C & D**), error bars represent ±SEM. Limit of Detection (LoD) values indicated with dashed line. Interpolation of standard curves were completed using Prism 9 GraphPad software.

**Table S1. The reported limit of detection, dilution factor and timeframe to result of commercially available ELISA kits for the detection of rituximab, adalimumab, ipilimumab and trastuzumab in human serum. Reported performance of LUMinescent AntiBody Sensor (LUMABS) for the detection of trastuzumab<sup>1</sup>.**

| TmAb        | Commercial ELISA | Biosensor | LoD     | Dilution Factor | Time     |
|-------------|------------------|-----------|---------|-----------------|----------|
| Rituximab   | ab237640 (Abcam) |           | ~ 31 pM | 1000 x          | ~2.5 hrs |
| Adalimumab  | ab237641 (Abcam) |           | ~ 68 pM | 10 x            | ~2.5 hrs |
| Trastuzumab | ab237645 (Abcam) |           | ~ 75 pM | 1000 x          | ~2.5 hrs |
| Ipilimumab  | ab237653 (Abcam) |           | ~ 67 pM | 300 x           | ~2.5 hrs |
| Trastuzumab |                  | LUMABS    | ~303 nM | N/A             | ~2.5 hrs |

### DNA and Protein Sequences

Within the sequence, the Affimer variable region sequences are denoted as XXX. The sequences and plasmids will be shared with any academic who does not have a commercial interest, under an MTA.

#### LgBit-GSG7-AffX

Protein

MAASVFTLEDFVGDWEQTAAYNLDQVLDQGGVSSLLQNLAVSVTPPIQRIVRSGENALKIDIHV IIPYEGLSADQM  
AQIEEVFKVVYPVDDHHFKVILPYGTLVIDGVTNMLNYFGRPYEGIAVFDGKKITVTGTLWNGNKIIDERLITP  
DGSMLFRVTINSAAAGSGGSGGSGGSGGSGGSGGSGGTSANSLEIEELARFAVDEHNKKENALLEFVRVVKAKEQX  
XXXXXXXXXXTMYLTLLEAKDGGKKKLYEAKVWVWXXXXXXXXXXNFKELQEFKPVVDLEHHHHHH

DNA

ATGGCGGCTAGCGTTTTTACCCTGGAAGATTTTCGTGGGCGACTGGGAACAGACCGCGGCGTACAACCTGGACCAA  
GTGCTGGATCAAGGTGGCGTGAGCAGCCTGCTGCAGAACCTGGCGGTGAGCGTTACCCCGATCCAACGTATTGTT  
CGTAGCGGCGAGAACCGCGCTGAAGATCGACATTCACGTGATCATTCGGTACGAAGGCCGTGAGCGCGGATCAGATG  
GCGCAAATCGAGGAAGTGTTCAGGTGGTTTACCCGGTTGACGATCACCACCTTAAAGTGATCCTGCCGTATGGT  
ACCCTGGTGATTGACGGCGTTACCCCGAACATGCTGAACTACTTCGGTCCGTATGAGGGCATCGCGTTTTT  
GATGGTAAGAAAATTACCGTGACCGGTACCCTGTGGAACGGCAACAAAATTATTGATGAGCGCCTGATTACCCCG  
GACGGCAGCATGCTGTTTTCGTGTGACCATTAATAGCGCGGCCCTGGGTCCGGCGGTTTCAGGCGGCTCTGGTGGC  
TCCGGTGGGTCAGGTGGTTCTGGCGGGTCTGGCACTAGTGCAAACTCCCTGGAAATCGAAGAAGTGGCTCGTTTC  
GCTGTTGACGAACACAACAAAAAGAAAACGCTCTGCTGGAATTCGTTTCGTGTTGTTAAAGCGAAAGAACAGXXX  
XXXXXXXXXXXXXXXXXXXXXXXXXACCATGTACTACCTGACCCTGGAAGCTAAAGACGGTGGTAAAAAGAACTG  
TACGAAGCGAAAGTTTGGGTAAAXXXXXXXXXXXXXXXXXXXXXXXXXXAACTTCAAAGAAGTGCAGGAGTTCAA  
CCAGTAGTCGACCTCGAGCACCACCACCACCACC

#### AffX-GSG7-LgBit

Protein

MAANSLEIEELARFAVDEHNKKENALLEFVRVVKAKEQXXXXXXXXXXTMYLTLLEAKDGGKKKLYEAKVWVWXXX  
XXXXXXXXXXNFKELQEFKPVAAAAGSGGSGGSGGSGGSGGSGGSGGTSVFTLEDFVGDWEQTAAYNLDQVLEQGGVSSLL  
LQNLAVSVTPPIQRIVRSGENALKIDIHV IIPYEGLSADQMAQIEEVFKVVYPVDDHHFKVILPYGTLVIDGVTN  
MLNYFGRPYEGIAVFDGKKITVTGTLWNGNKIIDERLITPDGSMLFRVTINSVDLEHHHHHH

DNA

ATGGCGGCTAGCAACTCCCTGGAAATCGAAGAAGCTGGCTCGTTTCGCTGTTGACGAACACAACAAAAAGAAAAC  
 GCTCTGCTGGAATTCGTTTCGTTGTTAAAGCGAAAGAACAGXXXXXXXXXXXXXXXXXXXXXXXXXXXXXACCATG  
 TACTACCTGACCCTGGAAGCTAAAGACGGTGGTAAAAAGAACTGTACGAAGCGAAAGTTTGGGTAAAXXXXXX  
 XXXXXXXXXXXXXXXXXXXXXAACTTCAAAGAAGCTGCAGGAGTTCAAACAGTAGCGGCCGCTGGGTCCGGCGGTTCA  
 GGCGGCTCTGGTGGCTCCGGTGGGTGAGGTGGTCTGGCGGGTCTGGCACTAGTGTTTTTTACCCTGGAAGATTTT  
 GTGGGCGACTGGGAACAGACCGCGGCTACAACCTGGACCAAGTGTGGAACAAGGTGGCGTGAGCAGCCTGCTG  
 CAGAACCTGGCGGTGAGCGTTACCCCGATCCAACGTATTTGTTTCGTAGCGGCGAGAACGCGCTGAAGATCGACATT  
 CACGTGATCATTCCGTACGAAGGCCTGAGCGCGGATCAGATGGCGCAAATCGAGGAAGTGTCAAGGTGGTTTAC  
 CCGGTTGACGATCACCCTTTAAAGTGATCCTGCCGTATGGTACCCTGGTGATTGACGGCGTTACCCCGAACATG  
 CTGAACTACTTCGGTTCGTCGGTATGAGGGCATCGCGGTTTTTGTATGGTAAGAAAATTACCCTGACCGGTACCCTG  
 TGGAACGGCAACAAAATTATTGATGAGCGCCTGATTACCCCGACGGCAGCATGCTGTTTTCGTGTGACCATTAAT  
 AGCGTCGACCTCGAGCACCACCACCACCACCAT

**SmBit101-GSG7-AffX**

**Protein**

MAASVTGYRLFEKESAAAAGSGSGSGSGSGSGSGSGSGTTSANSLEIEELARFAVDEHNKKNALLEFVRVVKAK  
 EQXXXXXXXXXXMYLTLLEAKDGGKKKLYEAKVWVXXXXXXXXXXNFKELQEFKPVVDLEHHHHHH

**DNA**

ATGGCGGCTAGCGTAACAGGATATAGGCTATTTGAAAAAGAGAGCGCGGCCGCTGGGTCCGGCGGTTTCAGGCGGC  
 TCTGGTGGCTCCGGTGGGTGAGGTGGTCTGGCGGGTCTGGCACTAGTGCAAACCTCCCTGGAAATCGAAGAAGCTG  
 GCTCGTTTTCGCTGTTGACGAACACAACAAAAAGAAAACGCTCTGCTGGAATTCGTTTCGTTGTTAAAGCGAAA  
 GAACAGXXXXXXXXXXXXXXXXXXXXXXXXXXXXXACCATGTACTACCTGACCCCTGGAAGCTAAAGACGGTGGTAAA  
 AAGAACTGTACGAAGCGAAAGTTTGGGTAAAXXXXXXXXXXXXXXXXXXXXXXXXXXXXXAACTTCAAAGAAGCTGCAG  
 GAGTTCAAACAGTAGTCGACCTCGAGCACCACCACCACCAC

**AffX-GSG7-SmBit101**

**Protein**

MAASNSLEIEELARFAVDEHNKKNALLEFVRVVKAKEQXXXXXXXXXXMYLTLLEAKDGGKKKLYEAKVWVXXX  
 XXXXXXXXNFKELQEFKPVAAAAGSGSGSGSGSGSGSGSGSGTTSVTGYRLFEKESVDLEHHHHHH

**DNA**

ATGGCGGCTAGCAACTCCCTGGAAATCGAAGAAGCTGGCTCGTTTCGCTGTTGACGAACACAACAAAAAGAAAAC  
 GCTCTGCTGGAATTCGTTTCGTTGTTAAAGCGAAAGAACAGXXXXXXXXXXXXXXXXXXXXXXXXXXXXXACCATG  
 TACTACCTGACCCTGGAAGCTAAAGACGGTGGTAAAAAGAACTGTACGAAGCGAAAGTTTGGGTAAAXXXXXX  
 XXXXXXXXXXXXXXXXXXXXXAACTTCAAAGAAGCTGCAGGAGTTCAAACAGTAGCGGCCGCTGGGTCCGGCGGTTCA  
 GGCGGCTCTGGTGGCTCCGGTGGGTGAGGTGGTCTGGCGGGTCTGGCACTAGTGTAAACAGGATATAGGCTATTT  
 GAAAAAGAGAGCGTCGACCTCGAGCACCACCACCACCAC

**Tables of Primers**

**Table S2. Primers used for Affimer amplification**

| Primer     | Sequence                                 |
|------------|------------------------------------------|
| NheI-Aff-f | ATGCGCTAGCAACTCCCTGGAAATCGAAGAAGCTG      |
| NotI-Aff-r | TAATGCGGCCGCTACTGGTTTGAACCTCTGCAGTTCTTTG |
| SpeI-Aff-f | AACGACTAGTGCAAACCTCCCTGGAAATCGAAGAAGCTG  |
| Sall-Aff-r | TAATGTCGACTACTGGTTTGAACCTCTGCAGTTCTTTG   |

**Table S3. Primers used for LgBiT amplification**

| Primer       | Sequence                          |
|--------------|-----------------------------------|
| LgBiT-NheI-f | TAATGCTAGCGTTTTTACCCTGGAAGATTTTCG |
| LgBiT-NotI-r | TTATGCGGCCGCGCTATTAATGGTCCACGAAAC |
| LgBiT-SpeI-f | TAAACTAGTGTTTTTTACCCTGGAAGATTTTCG |
| LgBiT-Sall-r | TAATGTCGACGCTATTAATGGTCCACGAAAC   |

**Table S4. Primers used to generate SmBiT (101)**

| Primer          | Sequence                                       |
|-----------------|------------------------------------------------|
| SmBiT101-NheI-f | TAATGCTAGCGTAACAGGATATAGGCTATTTGAAAAAGAGAGC    |
| SmBiT101-NotI-r | TTATGCGGCCGCGCTCTCTTTTTTCAAATAGCCTATATCCTGTTAC |
| SmBiT101-SpeI-f | TAAACTAGTGTAAACAGGATATAGGCTATTTGAAAAAGAGAGC    |
| SmBiT101-Sall-r | TAATGTCGACGCTCTCTTTTTTCAAATAGCCTATATCCTGTTAC   |

**Table S5. Primers used to generate GSG<sub>7</sub> linker**

| Primer                   | Sequence                                                    |
|--------------------------|-------------------------------------------------------------|
| NotI-GSG <sub>7</sub> -f | TTATGCGGCCGCTGGGTCCGGCGGTTTCAGGCGGCTCTGGTGGCTCCGGTGGGTCAGGT |
| SpeI-GSG <sub>7</sub> -r | TAAAAC TAGTGCCAGACCCGCCAGAACCACCTGACCCACCGGAGCCACCAGAGCC    |

1. M. van Rosmalen, Y. Ni, D. F. M. Vervoort, R. Arts, S. K. J. Ludwig and M. Merckx, *Analytical Chemistry*, 2018, **90**, 3592-3599
